# Supplementary material for: Enhancing electron transport through metal oxide adjustments in perovskite solar cells and their suitability for X-ray detection
Source: Royal Society of Chemistry journal article supplement (doi:10.1039/d4ta03785e), 2024-01-01
Supplement: d4ta03785e1.pdf [file d4ta03785e1.pdf]

## Supporting Information

### Enhancing Electron Transport through Metal Oxide Adjustments in Perovskite Solar Cells and Their Suitability for X-ray Detection

Xin Li<sup>1,2,3#</sup>, Sikandar Aftab<sup>4,5#</sup>, Hailiang Liu<sup>6#</sup>, Dhanasekaran Vikraman<sup>7</sup>, Sajjad Hussain<sup>8</sup>, Abdullah A. Al-Kahtani<sup>9</sup>, Ganesh Koyyada<sup>10</sup>, Jungwon Kang<sup>6</sup>, Erdi Akman<sup>11</sup>

<sup>1</sup>State Key Laboratory of Pulsed Power Laser Technology, National University of Defense Technology, Hefei 230037, Anhui, China

<sup>2</sup>Anhui Laboratory of Advanced Laser Technology, Hefei 230037, Anhui, China

<sup>3</sup>Nanhu laser laboratory, Changsha 410015, Hunan, China

<sup>4</sup>Department of Semiconductor Systems Engineering and Clean Energy, Sejong University, Seoul 05006, Republic of Korea

<sup>5</sup>Department of Artificial Intelligence and Robotics, Sejong University, Seoul 05006, Republic of Korea

<sup>6</sup>Department of Electronics and Electrical Engineering, Dankook University, Yongin 16890, Korea

<sup>7</sup>Division of Electronics and Electrical Engineering, Dongguk University-Seoul, Seoul 04620, Korea

<sup>8</sup>Department of Nanotechnology and Advanced Materials Engineering, Sejong University, Seoul, South Korea

<sup>9</sup>Chemistry Department, Collage of Science, King Saud University, P. O. Box 2455, Riyadh, 11451 Saudi Arabia

<sup>10</sup>School of Chemical Engineering, Yeungnam University, Gyeongsan 38541, Republic of Korea.

<sup>11</sup>Scientific and Technological Research & Application Center, Karamanoglu Mehmetbey University, Karaman, 70100, Turkey

# These authors are contributed equally

\*Email# [aftab@sejong.ac.kr](mailto:aftab@sejong.ac.kr)

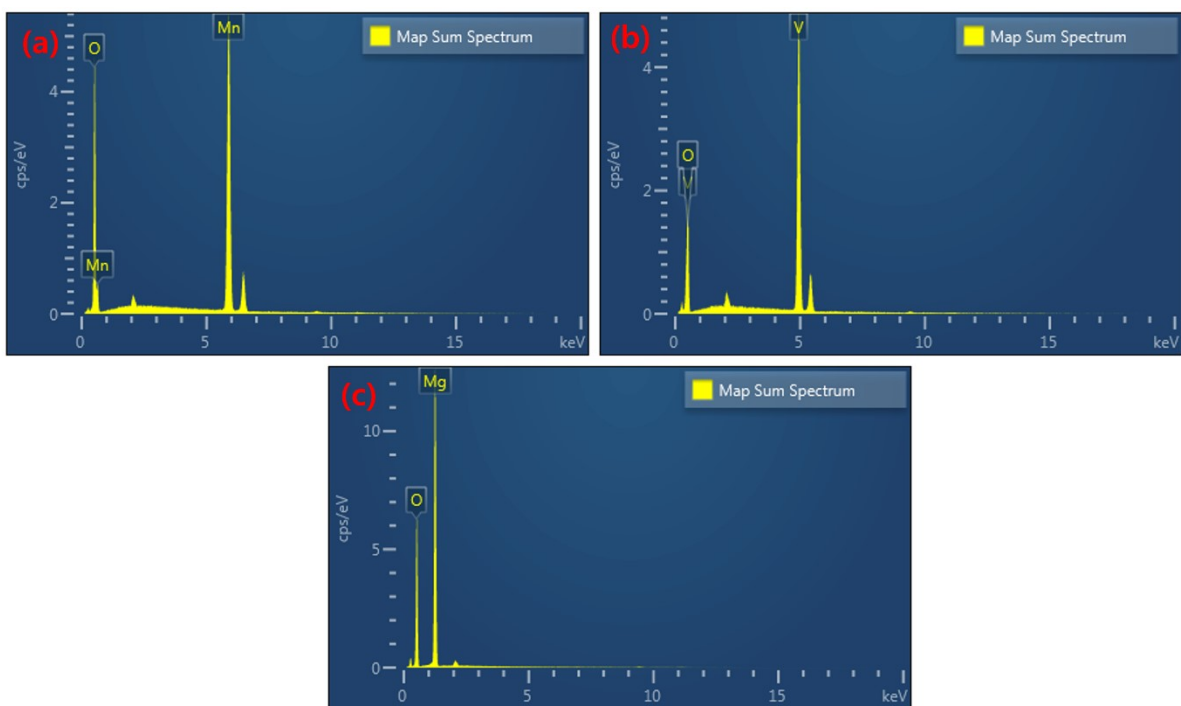

Figure S1. EDX mappings of (a) MnO<sub>2</sub>, (b) V<sub>2</sub>O<sub>5</sub>, and (c) MgO.

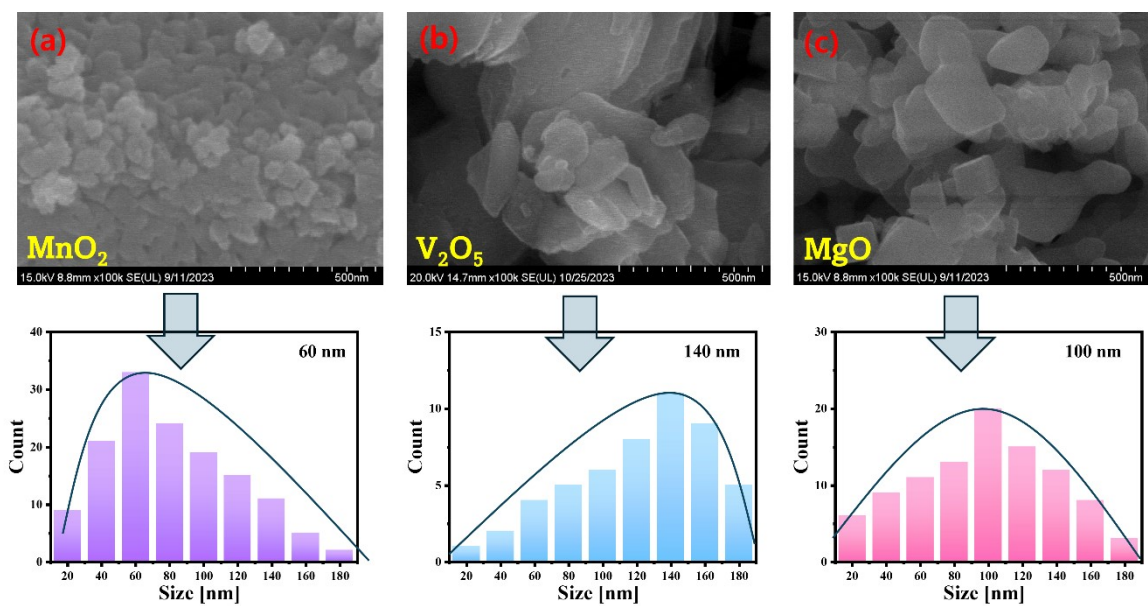

Figure S2. (a-c) SEM images with corresponding profile graphs.

## Characterization

The external quantum efficiency (EQE) of the solar cell was measured by using a computer-controlled xenon arc lamp (66477-150XV-R1) coupled with a monochromator (CS130B-1-FH). Current density-voltage (J-V) measurements of photovoltaic devices were evaluated using an electrometer (Keithley 6571B) and a solar simulator (San Ei Elec. XES 40S2-CE) using an AM 1.5G-filtered xenon (Xe) lamp exposure with an intensity of 100 mW/cm<sup>2</sup>. The built-in detector combined with CsI (Tl) scintillators (Hamamatsu J13113) converts incident X-ray photons into visible photons and the produced charge carriers during exposure were measured with the electrometer. J-V characteristics of the scintillator-coupled detectors were received using an X-ray generator (AJEX 2000H). The distance between the X-ray source and the scintillator-coupled detector was approximately 30 cm, and the exposure X-ray dose was measured using an ionization chamber (Capintec CII50) at the same distance. For all the experiments, The operating conditions of X-ray generator were fixed at 1.57 sec, 80 kVp and 63 mA for X-ray exposure time, tube voltage and tube current, respectively. All measurements were performed using a constant dose rate of 3.34 mGy and an X-ray source applied bias voltage of -0.6 V. To tune the charge-carrier collection, a bias voltage of -0.2 to -1.0 V, and a dose rate of 1.19 to 5.56 mGy was applied to the detector. The CCD and sensitivity of the detectors were computed from the measured charge amount during X-ray exposure based on the measured charge. Use the following formula to calculate the sensitivity related to X-ray photon to charge conversion efficiency.

$$\text{Sensitivity } \left( \frac{\text{mA}}{\text{Gy} \cdot \text{cm}^2} \right) = \frac{\text{Charges during the X - ray ON [mA]} - \text{Charges during the X - ray OFF [mA]}}{\text{Absorbed dose [Gy]} \cdot \text{Detection Area [cm}^2\text{]}}$$

The dose absorbed by the exposure was measured using an ionization chamber.

Field-emission scanning electron microscopy (FE-SEM, Hitachi S-4700) was used to analyze the compositional properties of metal oxides (MnO<sub>2</sub>, V<sub>2</sub>O<sub>5</sub> and MgO) and cross-section of the fabricated device. UV-vis optical spectroscopy (Optizen 2120UV) was used to measure the absorption spectra of FA<sub>0.5</sub>MA<sub>0.5</sub>PbI<sub>3</sub>:PCBM doped with 2 wt% metal oxides (MnO<sub>2</sub>, V<sub>2</sub>O<sub>5</sub> and MgO). The topology and roughness of the PCBM layer doped with 2 wt% metal oxides

(MnO<sub>2</sub>, V<sub>2</sub>O<sub>5</sub> and MgO) were investigated by using atomic force microscopy (AFM, Veeco Dimension 3100).

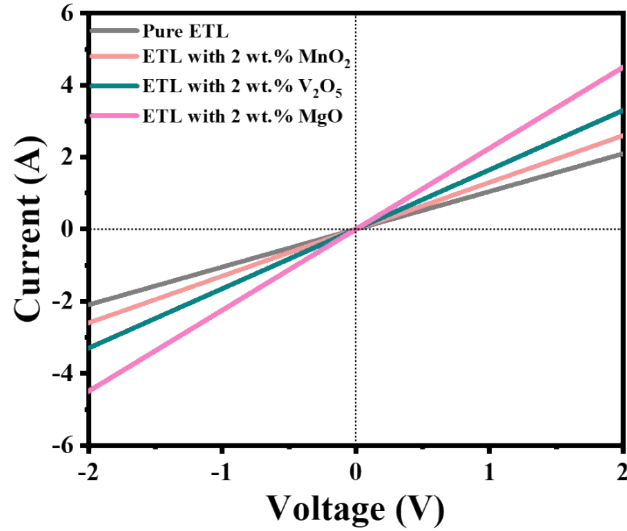

**Figure S3.** I-V curves of ITO/PCBM/Ag and ITO/Metal oxide:PCBM/Ag devices.

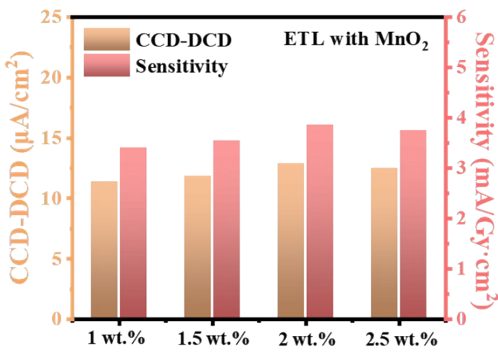

| Device  | CCD-DDC [μA/cm <sup>2</sup> ] | Sensitivity [mA/Gy·cm <sup>2</sup> ] |
|---------|-------------------------------|--------------------------------------|
| 1 wt%   | 11.39                         | 3.41                                 |
| 1.5 wt% | 11.86                         | 3.55                                 |
| 2 wt%   | 12.89                         | 3.86                                 |
| 2.5 wt% | 12.49                         | 3.74                                 |

**Figure S4.** CCD-DDC and sensitivity for different concentrations (1, 1.5, 2 and 2.5 wt.%) of MnO<sub>2</sub> blended PCBM ETL.

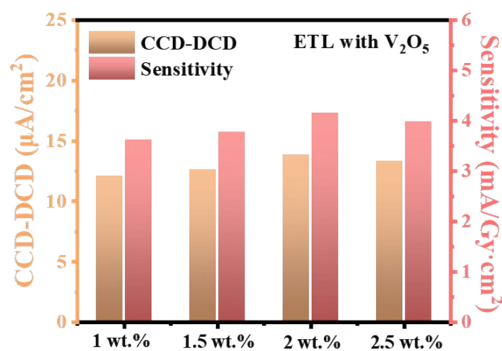

| Device  | CCD-DDC [ $\mu\text{A}/\text{cm}^2$ ] | Sensitivity [ $\text{mA}/\text{Gy}\cdot\text{cm}^2$ ] |
|---------|---------------------------------------|-------------------------------------------------------|
| 1 wt%   | 12.09                                 | 3.62                                                  |
| 1.5 wt% | 12.63                                 | 3.78                                                  |
| 2 wt%   | 13.86                                 | 4.15                                                  |
| 2.5 wt% | 13.33                                 | 3.99                                                  |

**Figure S5.** CCD-DDC and sensitivity for different concentrations (1, 1.5, 2 and 2.5 wt.%) of  $\text{V}_2\text{O}_5$  blended PCBM ETL.
